# Supplementary material
Source: Springer Nature journal article supplement (https://www.springermedizin.de/resource/supplementary/12888_2011_1115_MOESM7_ESM.pdf/9479184)

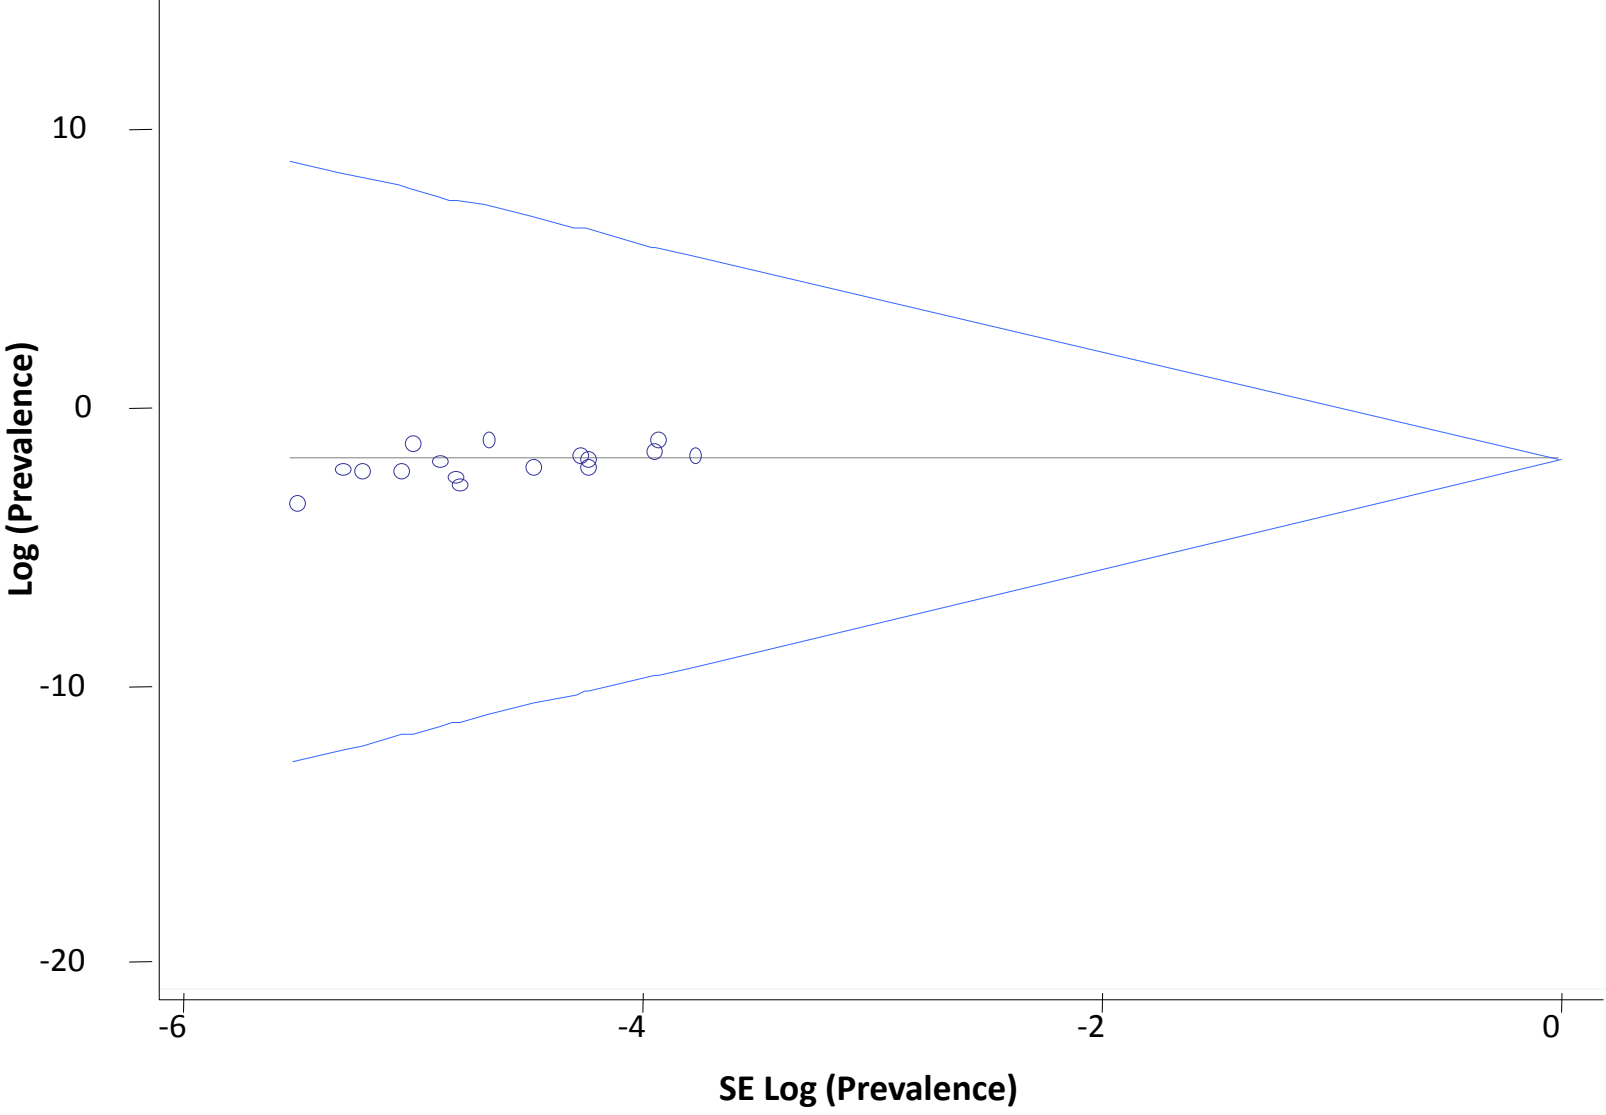

Supplement: MOESM7 [file 9479184]
